# Supplementary material for: Evaluation of pulmonary and systemic toxicity following lung exposure to graphite nanoplates: a member of the graphene-based nanomaterial family
Source: PubMed Central journal article supplement (PMC4915050; doi:10.1186/s12989-016-0145-5), 2016-06-21
Supplement: 12989_2016_145_MOESM1_ESM.pdf [file 12989_2016_145_MOESM1_ESM.pdf]

**Figure S1**

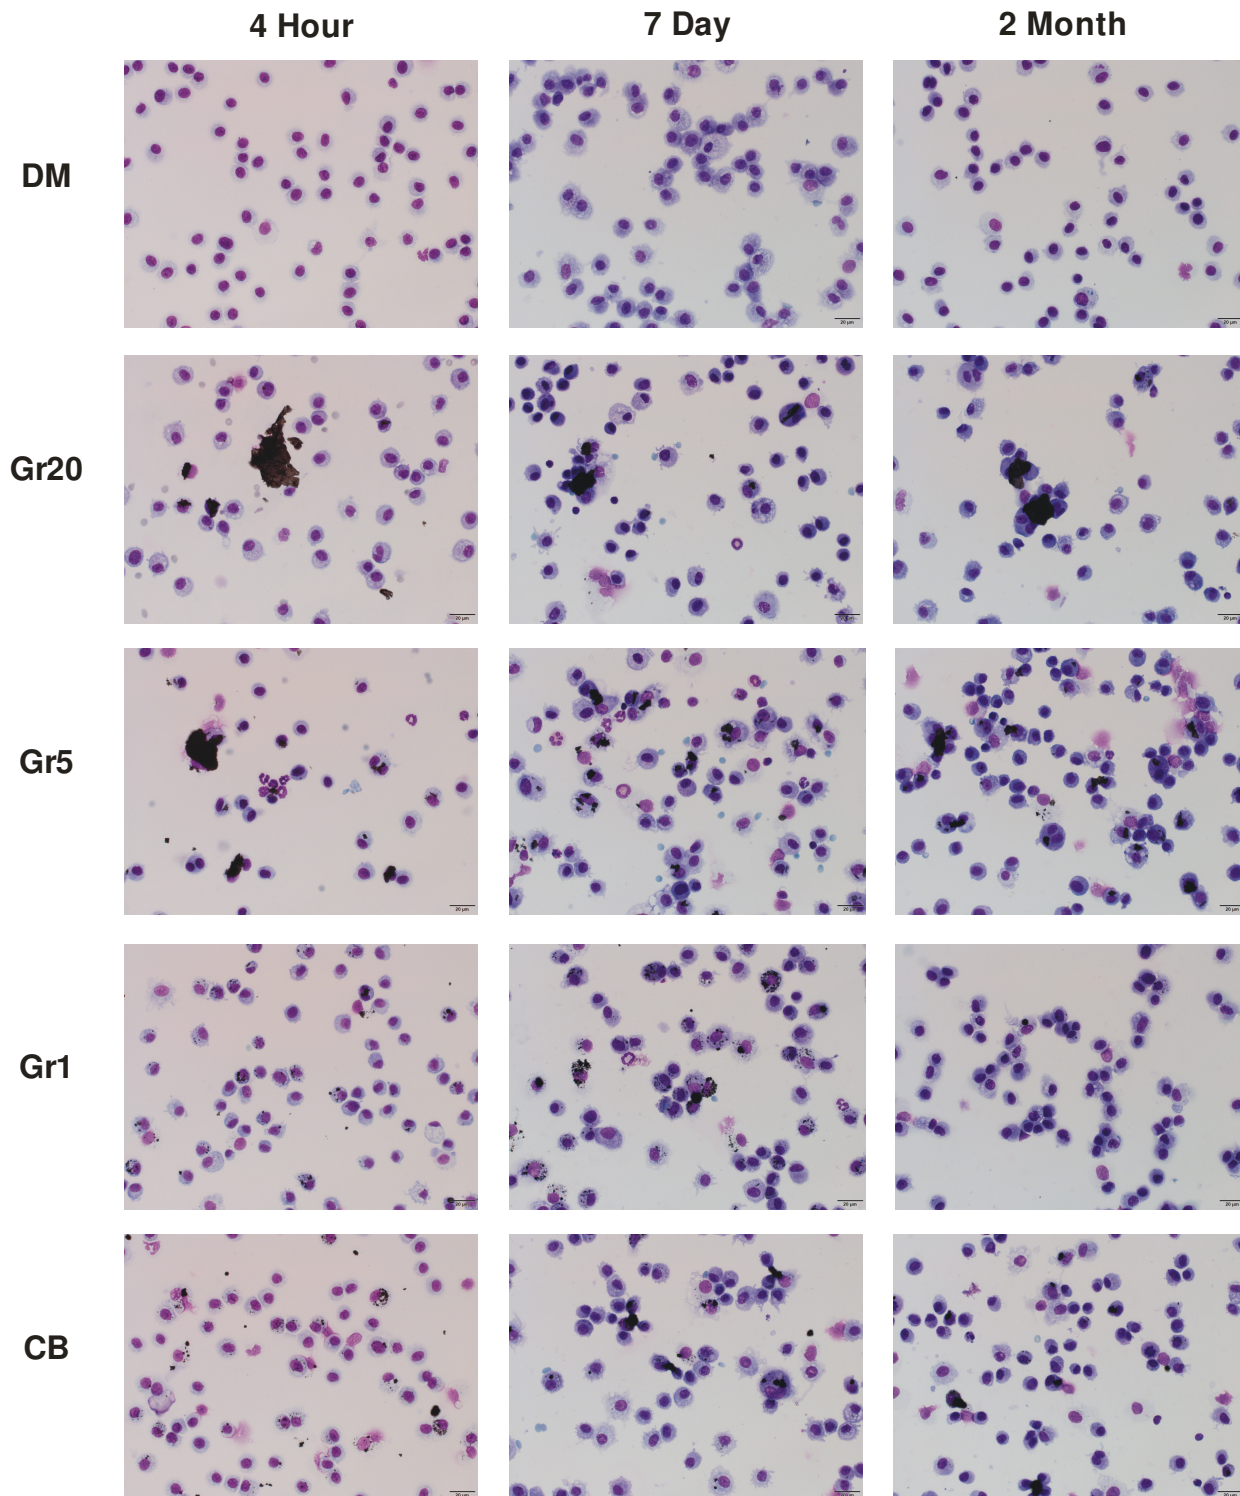

**Supplemental Figure Legend:** Images of cells recovered by BAL from animals exposed to DM or 40  $\mu\text{g}$  of Gr20, Gr5, Gr1, or CB, at 4hours, 7 days, and 2 months post-exposure illustrating particle burden in macrophages from the alveolar region.
