# Supplementary material for: Evaluation of pulmonary and systemic toxicity following lung exposure to graphite nanoplates: a member of the graphene-based nanomaterial family
Source: PubMed Central journal article supplement (PMC4915050; doi:10.1186/s12989-016-0145-5), 2016-06-21
Supplement: 12989_2016_145_MOESM2_ESM.pdf [file 12989_2016_145_MOESM2_ESM.pdf]

**Table S1. List of total proteins analyzed by RodentMAP® analyses, abbreviations, and alternate nomenclature**

|                                                      |                                                                                                                                                                                   |
|------------------------------------------------------|-----------------------------------------------------------------------------------------------------------------------------------------------------------------------------------|
| 1. Apolipoprotein A-1                                | Apo A-1                                                                                                                                                                           |
| 2. C-Reactive Protein Mouse                          | CRP Mouse                                                                                                                                                                         |
| 3. CD40                                              | CD40; Bp50, TNFRSF5                                                                                                                                                               |
| 4. CD40 Ligand                                       | CD40L, CD154                                                                                                                                                                      |
| 5. Eotaxin                                           | Eotaxin; CCL11 (eotaxin-1), CCL24 (eotaxin-2), CCL26 (eotaxin-3)                                                                                                                  |
| 6. Epidermal Growth Factor Mouse                     | EGF Mouse; prostatic growth factor (PGF), urogastrone, human milk growth factor (HMGF)                                                                                            |
| 7. Factor VII                                        | Factor VII; proconvertin                                                                                                                                                          |
| 8. Fibrinogen                                        | Fibrinogen                                                                                                                                                                        |
| 9. Fibroblast Growth Factor-9                        | FGF-9; heparin binding growth factor (HBGF) - 9                                                                                                                                   |
| 10. Fibroblast Growth Factor-basic                   | FGF-basic                                                                                                                                                                         |
| 11. Granulocyte Chemotactic Protein-2 Mouse          | GCP-2 Mouse; CXCL6, chemokine alpha (CKA)-3                                                                                                                                       |
| 12. Granulocyte-Macrophage Colony-Stimulating Factor | GM-CSF; CSF-2                                                                                                                                                                     |
| 13. Growth Hormone                                   | GH; somatotropic hormone, somatotropin, somatropin                                                                                                                                |
| 14. Growth-Regulated Alpha Protein                   | KC/GRO;CXCL1, neutrophil activating protein (NAP)-3, melanoma growth stimulating activity alpha (MGSA- $\alpha$ ), cytokine induced neutrophil chemoattractant (CINC) – 2 $\beta$ |
| 15. Haptoglobin                                      | Haptoglobin                                                                                                                                                                       |
| 16. Immunoglobulin A                                 | IgA                                                                                                                                                                               |
| 17. Insulin                                          | Insulin                                                                                                                                                                           |
| 18. Interferon-gamma                                 | IFN- $\gamma$ ; immune interferon (IIF), type 2 interferon, T-interferon, mitogen induced interferon                                                                              |
| 19. Interferon gamma Induced Protein 10              | IP-10; CXCL10, C7                                                                                                                                                                 |
| 20. Interleukin-1 alpha                              | IL-1 $\alpha$                                                                                                                                                                     |
| 21. Interleukin-1 beta                               | IL-1 $\beta$ ; catabolin                                                                                                                                                          |
| 22. Interleukin-2                                    | IL-2; lymphokine, T cell growth factor (TCGF), lymphocyte proliferating factor (LPF)                                                                                              |
| 23. Interleukin-3                                    | IL-3; mast cell growth factor (MCGF), multi-CSF, hemopoietin-2, stem cell activating factor (SAF)                                                                                 |

|                                            |                                                                                                                                         |
|--------------------------------------------|-----------------------------------------------------------------------------------------------------------------------------------------|
| 24. Interleukin-4                          | IL-4; B cell stimulating factor (BSF)-1, B cell growth factor (BCGF)-1                                                                  |
| 25. Interleukin-5                          | IL-5; BCGF-2, eosinophil differentiation factor (EDF)                                                                                   |
| 26. Interleukin-6                          | IL-6; BSF-2, fibronectin stimulating factor (FSF), hepatocyte stimulating factor (HSF), natural killer activating factor (NKAF)         |
| 27. Interleukin-7                          | IL-7; pre-B cell growth factor (PBGF), lymphopoietin-1, thymocyte growth factor                                                         |
| 28. Interleukin-10                         | IL-10; B cell derived T cell growth factor (B-TCGF), cytokine synthesis inhibitory factor (CSIF), T cell growth factor (TGIF)           |
| 29. Interleukin-11                         | IL-11; adipogenesis inhibitory factor (AGIF), megakaryocyte-CSF                                                                         |
| 30. Interleukin-12 Subunit p70             | IL-12p70; cytotoxic lymphocyte maturation factor (CLMF), natural killer cell stimulatory factor (NKSF), T cell stimulatory factor (TSF) |
| 31. Interleukin-17A                        | IL-17A                                                                                                                                  |
| 32. Interleukin-18                         | IL-18; IFN- $\gamma$ inducing factor, IL-1 $\gamma$ , IL1F4                                                                             |
| 33. Leptin                                 | Leptin; obesity factor, obese protein                                                                                                   |
| 34. Leukemia Inhibitory Factor             | LIF                                                                                                                                     |
| 35. Lymphotoctin                           | LTN; XCL1                                                                                                                               |
| 36. Macrophage Colony-Stimulating Factor-1 | M-CSF-1, CSF-1, macrophage growth factor (MGF)                                                                                          |
| 37. Macrophage-Derived Chemokine           | MDC, CCL22, stimulated T cell chemotactic protein (STCP)-1, dendritic cell/B cell derived chemokine (DC/B-Ck)                           |
| 38. Macrophage Inflammatory Protein-1alpha | MIP-1 $\alpha$ ; CCL3                                                                                                                   |
| 39. Macrophage Inflammatory Protein-1beta  | MIP-1 $\beta$ ; CCL4, endogenous pyrogen                                                                                                |
| 40. Macrophage Inflammatory Protein-1gamma | MIP-1 $\gamma$ ; CCL9, CCF18                                                                                                            |
| 41. Macrophage Inflammatory Protein-2      | MIP-2, CXCL2, CINC-2 $\alpha$                                                                                                           |
| 42. Macrophage Inflammatory Protein-3 beta | MIP-3 $\beta$ , CCL19, EBI-1-Ligand chemokine (ELC), Exodus-3                                                                           |
| 43. Matrix Metalloproteinase-9             | MMP-9;collagenase-5, gelatinase B, gelatinase type IV-B, polymorphonuclear leukocyte gelatinase                                         |
| 44. Monocyte Chemotactic Protein-1         | MCP-1, CCL2, HC11, glioma-derived monocyte chemotactic factor (GDCF),                                                                   |
| 45. Monocyte Chemotactic Protein-3         | MCP-3; CCL7, mouse mast cell activation-related chemokine (MARC)                                                                        |
| 46. Monocyte Chemotactic Protein-5         | MCP-5; CCL12                                                                                                                            |

|                                                   |                                                                                                                                                 |
|---------------------------------------------------|-------------------------------------------------------------------------------------------------------------------------------------------------|
| 47. Myeloperoxidase                               | MPO                                                                                                                                             |
| 48. Myoglobin                                     | Myoglobin                                                                                                                                       |
| 49. Oncostatin-M                                  | OSM                                                                                                                                             |
| 50. Plasminogen Activator Inhibitor 1             | PAI-1; endothelial plasminogen activator inhibitor, mesosecrin, monocyte suppressor factor (MSF), serpin E1                                     |
| 51. Resistin                                      | Resistin; adipose tissue-specific secretory factor (ADSF), C/EBP-epsilon-regulated myeloid-specific secreted cysteine-rich protein              |
| 52. Serum Amyloid P-Component                     | SAP                                                                                                                                             |
| 53. Stem Cell Factor                              | SCF; hemolymphopoietic growth factor (HLGF)-1, mast cell growth factor, stem cell growth factor (SCGF), kit ligand (KL)                         |
| 54. T-Cell-Specific Protein RANTES                | RANTES, CCL5, SIS-delta, eosinophil chemotactic polypeptide (EoCP)-1                                                                            |
| 55. Thrombopoietin                                | TPO; thrombopoiesis stimulating factor (TSF)                                                                                                    |
| 56. Tissue Inhibitor of Metalloproteinase 1 Mouse | TIMP-1; human gollaginase inhibitor (HCI), fibroblast elongation factor, fibroblast collagenase inhibitor beta-1 anticollaginase, embryogenin-1 |
| 57. Tumor Necrosis Factor alpha                   | TNF- $\alpha$ ; cachectin, differentiation inducing factor (DIF), mono-derived fibroblast growth factor (MD-FGF)                                |
| 58. Vascular Cell Adhesion Molecule-1             | VCAM-1; CD106                                                                                                                                   |
| 59. Vascular Endothelial Growth Factor A          | VEGF-A; vasculotropin, vascular, endothelial cell proliferation factor, vascular permeability factor (VPF)                                      |
| 60. von Willebrand factor                         | vWF                                                                                                                                             |
