# Supplementary material for: Evaluation of pulmonary and systemic toxicity following lung exposure to graphite nanoplates: a member of the graphene-based nanomaterial family
Source: PubMed Central journal article supplement (PMC4915050; doi:10.1186/s12989-016-0145-5), 2016-06-21
Supplement: 12989_2016_145_MOESM3_ESM.pdf [file 12989_2016_145_MOESM3_ESM.pdf]

**Table S2: Genes contained in the pre-designed TaqMan® array**

|                        |                        |
|------------------------|------------------------|
| Gapdh-Mm99999915_g1    | Clu-Mm00442773_m1      |
| Hprt-Mm01545399_m1     | Fos-Mm00487425_m1      |
| Il1a-Mm00439620_m1     | Mt1-Mm00496660_g1      |
| Il1b-Mm00434228_m1     | Mt2-Mm00809556_s1      |
| Il5-Mm00439646_m1      | Fas-Mm00433237_m1      |
| Il6-Mm00446190_m1      | Hmox1-Mm00516004_m1    |
| Il10-Mm00439616_m1     | Serpine1-Mm00435860_m1 |
| Il12a-Mm00434165_m1    | Thbs1-Mm01335418_m1    |
| Il13-Mm00434204_m1     | F3-Mm00438853_m1       |
| Ifng-Mm00801778_m1     | Fgg-Mm00513575_m1      |
| 18S-Hs99999901_s1      | Edn1-Mm00438656_m1     |
| Tnf-Mm00443258_m1      | Ednra-Mm01243722_m1    |
| Ptgs2-Mm00478374_m1    | Sele-Mm00441278_m1     |
| Icam1-Mm00516023_m1    | Selp-Mm00441295_m1     |
| Arg1-Mm00475988_m1     | Vcam1-Mm01320970_m1    |
| Arg2-Mm00477592_m1     | Pecam1-Mm00476702_m1   |
| Itgam-Mm00434455_m1    | Mmp9-Mm00442991_m1     |
| Emr1-Mm00802529_m1     | Mmp2-Mm00439498_m1     |
| Nos2-Mm00440485_m1     | Timp1-Mm00441818_m1    |
| Ccl2-Mm00441242_m1     | Timp2-Mm00441825_m1    |
| Ccl4-Mm00443111_m1     | Timp4-Mm00446568_m1    |
| Ccl11-Mm00441238_m1    | Col1a1-Mm00801666_g1   |
| Ccl22-Mm00436439_m1    | Col3a1-Mm00802331_m1   |
| Ccl5-Mm01302428_m1     | Col4a4-Mm00801574_m1   |
| Ccr2-Mm99999051_gH     | Col4a2-Mm00802386_m1   |
| Ccr5-Mm01963251_s1     | Nid1-Mm00477827_m1     |
| Csf1-Mm00432688_m1     | Nid2-Mm00456212_m1     |
| Csf2-Mm00438328_m1     | Igf1r-Mm00802831_m1    |
| Csf3-Mm00438334_m1     | Igf2-Mm00439565_g1     |
| Cxcl1-Mm00433859_m1    | Igf1-Mm00439561_m1     |
| Cxcl2-Mm00436450_m1    | Vegfa-Mm00437304_m1    |
| Cxcl12-Mm00445552_m1   | Pdgfa-Mm00435540_m1    |
| Cxcr2-Mm99999117_s1    | Fgfr1-Mm00438923_m1    |
| S100a8-Mm00496696_g1   | Pgap2-Mm00523992_g1    |
| Spp1-Mm00436767_m1     | Fgf1-Mm00438906_m1     |
| Hspa1b-Mm03038954_s1   | Egf-Mm00438696_m1      |
| Dnaja1-Mm00787254_s1   | Ctgf-Mm00515790_g1     |
| Hsp90aa1-Mm00658568_gH | Tgfb1-Mm00441724_m1    |
| Hif1a-Mm00468875_m1    | Tgfb1-Mm00436971_m1    |
| Hif1an-Mm00621168_m1   | Ltbp1-Mm00498234_m1    |
| Hif3a-Mm00469373_m1    | Sod2-Mm00449726_m1     |
| Egr1-Mm00656724_m1     | Vwf-Mm00550376_m1      |
| Bbc3-Mm00519268_m1     | Cd44-Mm01277163_m1     |
| Casp1-Mm00438023_m1    | Nfe2l2-Mm00477784_m1   |
| Casp4-Mm00432307_m1    | Cat-Mm00437992_m1      |
| Gadd45a-Mm00432802_m1  | Nqo1-Mm00500821_m1     |
| Cryaa-Mm00660256_m1    | Cyba-Mm00514478_m1     |
| Rad-Mm00451053_m1      | Nox4-Mm00479246_m1     |
