# Supplementary material for: Evaluation of pulmonary and systemic toxicity following lung exposure to graphite nanoplates: a member of the graphene-based nanomaterial family
Source: PubMed Central journal article supplement (PMC4915050; doi:10.1186/s12989-016-0145-5), 2016-06-21
Supplement: 12989_2016_145_MOESM4_ESM.pdf [file 12989_2016_145_MOESM4_ESM.pdf]

Table S3. Differentially expressed genes in lung tissue following exposure to 40 µg of Gr20, Gr5, or Gr1.

| Gene            | 4 Hour       |             |             | 1 Day        |             |             |
|-----------------|--------------|-------------|-------------|--------------|-------------|-------------|
|                 | Gr 20 - High | Gr 5 - High | Gr 1 - High | Gr 20 - High | Gr 5 - High | Gr 1 - High |
| <i>Il1b</i>     | ↑            | ↑↑          | ↑           | ↑            | ↑           |             |
| <i>Il5</i>      | ↑↑↑          | ↑↑↑         | ↑↑          | ↑            | ↑           |             |
| <i>Il6</i>      | ↑↑↑          | ↑↑↑         | ↑↑↑         | ↑↑↑          | ↑↑          | ↑           |
| <i>Il10</i>     | ↑            | ↑↑          |             |              |             |             |
| <i>Il13</i>     | ↑↑↑          | ↑↑↑         | ↑↑          |              |             |             |
| <i>Arg1</i>     | ↑            | ↑           |             | ↑↑           | ↑↑          |             |
| <i>Arg2</i>     |              |             |             | ↑            | ↑           |             |
| <i>Ccl2</i>     | ↑↑↑          | ↑↑↑         | ↑↑↑         | ↑↑↑          | ↑↑↑         | ↑↑          |
| <i>Ccl11</i>    | ↑↑           | ↑↑↑         | ↑           | ↑↑           | ↑↑          |             |
| <i>Ccl22</i>    | ↑↑           | ↑↑          | ↑           | ↑            | ↑           |             |
| <i>Ccr5</i>     |              | ↑↑          |             |              |             |             |
| <i>Csf2</i>     |              |             |             |              | ↑           |             |
| <i>Csf3</i>     | ↑↑↑          | ↑↑↑         | ↑↑↑         |              |             |             |
| <i>Cxcl1</i>    | ↑↑           | ↑↑↑         | ↑↑↑         | ↑↑↑          | ↑↑↑         | ↑↑          |
| <i>Cxcl2</i>    | ↑↑           | ↑↑↑         | ↑↑↑         | ↑↑           | ↑↑          | ↑↑          |
| <i>Cxcr2</i>    |              | ↑           |             |              |             |             |
| <i>Hspa1b</i>   | ↑            | ↑↑          |             |              |             |             |
| <i>Bbc3</i>     |              | ↓           |             |              |             |             |
| <i>Casp4</i>    | ↑            | ↑           | ↑           | ↑            | ↑           |             |
| <i>Cryaa</i>    | ↓            | ↓           |             |              |             |             |
| <i>Fos</i>      | ↑            | ↑           | ↑           |              |             |             |
| <i>Mt1</i>      | ↑↑           | ↑↑          | ↑           | ↑            |             |             |
| <i>Mt2</i>      | ↑↑           | ↑↑↑         | ↑↑          |              |             |             |
| <i>Hmox1</i>    |              |             |             | ↑            |             |             |
| <i>Serpine1</i> | ↑            | ↑↑          | ↑           |              |             |             |
| <i>Thbs1</i>    | ↑            | ↑           | ↑           |              |             |             |
| <i>Fgg</i>      |              |             |             | ↑↑           | ↑           |             |
| <i>Sele</i>     | ↑↑↑          | ↑↑↑         | ↑↑↑         |              |             |             |
| <i>Selp</i>     | ↑↑↑          | ↑↑↑         | ↑↑↑         | ↑            |             |             |
| <i>Timp1</i>    | ↑↑           | ↑↑          | ↑↑          | ↑↑           | ↑↑          | ↑           |
| <i>Timp4</i>    |              |             |             | ↑            |             |             |
| <i>Igf1</i>     |              |             |             | ↑            | ↑           |             |
| <i>Cat</i>      |              | ↓           |             |              |             |             |
| <i>Nox4</i>     |              | ↓           |             |              |             |             |

Note: A single arrow indicates a 1.5-3.5 fold change, a double arrow indicates a 3.6-10 fold change, and a triple arrow indicates a 10 fold change.
